# Supplementary material for: Anti-obesity effects of instant fermented teas in vitro and in mice with high-fat-diet-induced obesity
Source: Royal Society of Chemistry journal article supplement (doi:10.1039/c9fo00162j), 2019-01-01
Supplement: c9fo00162j1.pdf [file c9fo00162j1.pdf]

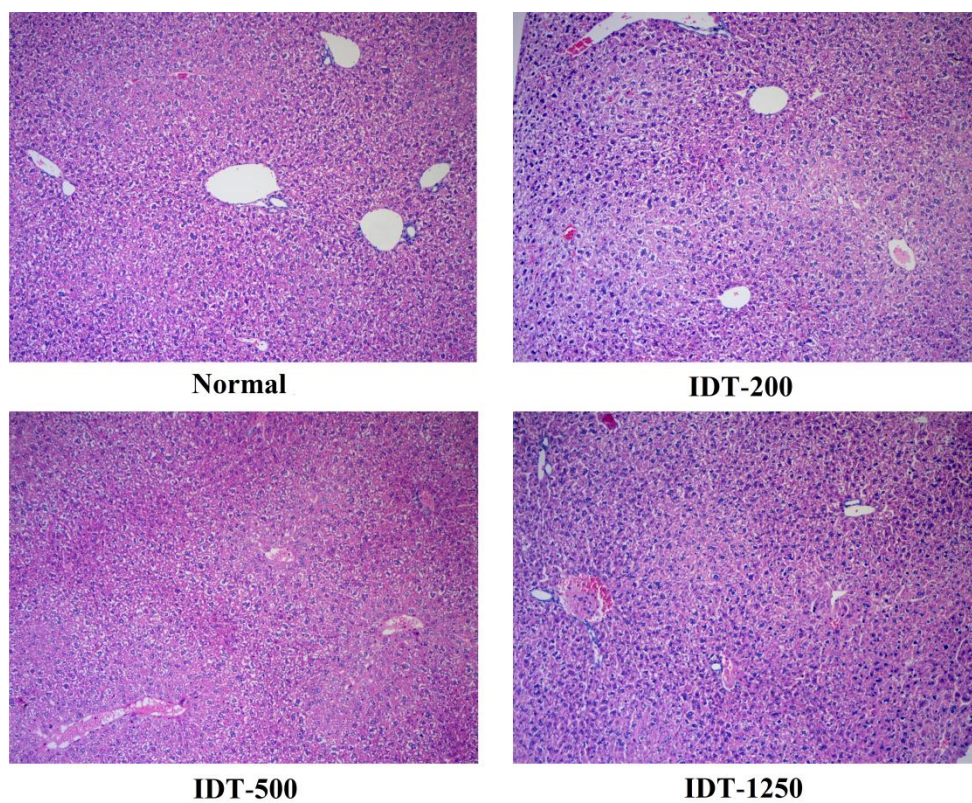

Supplementary Figure 1. Hematoxylin-Eosin (HE) staining of liver tissue in 4 group mice. The magnification was  $\times 100$ . Normal group: sterilized water 0.2mL/20g BW (body weight); IDT-200: Instant dark tea (IDT) 200 mg/kg BW; IDT-500: IDT 500 mg/kg BW; IDT-1250: IDT 1250 mg/kg BW.
